# Supplementary material for: Dietary and Health Characteristics of Korean Adults According to the Level of Energy Intake from Carbohydrate: Analysis of the 7th (2016–2017) Korea National Health and Nutrition Examination Survey Data
Source: PubMed Central journal article supplement (PMC7071296; doi:10.3390/nu12020429), 2020-02-07
Supplement: nutrients-12-00429-s001.pdf [file nutrients-12-00429-s001.pdf]

**Table S1.** The energy and nutrient intake of Korean adults according to the level of energy intake from carbohydrate.

|                    | <45% than<br>45%<br>(n = 527) | 45–50% 50%<br>(n = 459)  | 50–55% 55%<br>(n = 740)  | 55–60% 60%<br>(n = 1037) | 60–65% 65%<br>(n = 1342) | 65–70% 70%<br>(n = 1281) | 70–75% 75%<br>(n = 1116) | ≥75%<br>(n = 1064)       | p <sup>1</sup> |
|--------------------|-------------------------------|--------------------------|--------------------------|--------------------------|--------------------------|--------------------------|--------------------------|--------------------------|----------------|
|                    | Mean ± SE                     |                          |                          |                          |                          |                          |                          |                          |                |
| Energy (kcal)      | 2292 ± 45 <sup>a,2</sup>      | 2156 ± 42 <sup>b</sup>   | 2090 ± 34 <sup>b</sup>   | 2053 ± 28 <sup>b</sup>   | 1932 ± 22 <sup>c</sup>   | 1898 ± 23 <sup>c</sup>   | 1778 ± 25 <sup>d</sup>   | 1684 ± 26 <sup>e</sup>   | <0.001         |
| Protein (g)        | 117.6 ± 2.7 <sup>a</sup>      | 99.7 ± 2.2 <sup>b</sup>  | 91.4 ± 1.8 <sup>c</sup>  | 82.7 ± 1.2 <sup>d</sup>  | 73.9 ± 0.9 <sup>e</sup>  | 67.3 ± 0.9 <sup>f</sup>  | 57.6 ± 0.8 <sup>g</sup>  | 47.3 ± 0.8 <sup>h</sup>  | <0.001         |
| Fat (g)            | 105.9 ± 2.6 <sup>a</sup>      | 80.7 ± 1.8 <sup>b</sup>  | 69.6 ± 1.2 <sup>c</sup>  | 59.9 ± 0.9 <sup>d</sup>  | 47.4 ± 0.6 <sup>e</sup>  | 38.9 ± 0.5 <sup>f</sup>  | 29.0 ± 0.4 <sup>g</sup>  | 17.7 ± 0.3 <sup>h</sup>  | <0.001         |
| Vitamin A (µg RAE) | 543 ± 44 <sup>a</sup>         | 452 ± 24 <sup>ab</sup>   | 449 ± 16 <sup>a</sup>    | 408 ± 12 <sup>abc</sup>  | 416 ± 24 <sup>ab</sup>   | 359 ± 11 <sup>bc</sup>   | 328 ± 10 <sup>c</sup>    | 267 ± 16 <sup>d</sup>    | <0.001         |
| Thiamin (mg)       | 2.38 ± 0.08 <sup>a</sup>      | 2.01 ± 0.05 <sup>b</sup> | 1.95 ± 0.04 <sup>b</sup> | 1.87 ± 0.03 <sup>b</sup> | 1.66 ± 0.02 <sup>c</sup> | 1.63 ± 0.03 <sup>c</sup> | 1.52 ± 0.02 <sup>c</sup> | 1.40 ± 0.02 <sup>d</sup> | <0.001         |
| Riboflavin (mg)    | 2.09 ± 0.05 <sup>a</sup>      | 1.83 ± 0.05 <sup>b</sup> | 1.78 ± 0.03 <sup>b</sup> | 1.70 ± 0.02 <sup>b</sup> | 1.55 ± 0.02 <sup>c</sup> | 1.44 ± 0.02 <sup>d</sup> | 1.23 ± 0.02 <sup>e</sup> | 0.99 ± 0.02 <sup>f</sup> | <0.001         |
| Niacin (mg)        | 23.3 ± 0.7 <sup>a</sup>       | 19.9 ± 0.5 <sup>b</sup>  | 19.3 ± 0.4 <sup>b</sup>  | 17.1 ± 0.3 <sup>c</sup>  | 15.0 ± 0.2 <sup>d</sup>  | 14.1 ± 0.2 <sup>e</sup>  | 12.5 ± 0.2 <sup>f</sup>  | 11.0 ± 0.2 <sup>g</sup>  | <0.001         |
| Vitamin C (mg)     | 66 ± 4 <sup>d</sup>           | 69 ± 3 <sup>d</sup>      | 82 ± 4 <sup>bc</sup>     | 80 ± 3 <sup>c</sup>      | 80 ± 3 <sup>bc</sup>     | 86 ± 4 <sup>bc</sup>     | 89 ± 4 <sup>ab</sup>     | 101 ± 4 <sup>a</sup>     | <0.001         |
| Calcium (mg)       | 529 ± 17 <sup>b</sup>         | 545 ± 17 <sup>ab</sup>   | 536 ± 11 <sup>ab</sup>   | 553 ± 11 <sup>a</sup>    | 532 ± 9 <sup>a</sup>     | 502 ± 8 <sup>b</sup>     | 463 ± 9 <sup>b</sup>     | 392 ± 7 <sup>c</sup>     | <0.001         |
| Iron (mg)          | 16.4 ± 0.5                    | 16.7 ± 0.5               | 16.7 ± 0.5               | 15.7 ± 0.3               | 15.2 ± 0.3               | 14.8 ± 0.3               | 14.7 ± 0.4               | 13.5 ± 0.3               | 0.062          |

Note: The data were analyzed using the complex sample module. <45%: less than 45%, 45–50%: 45% to less than 50%, 50–55%: 50% to less than 55%, 55–60%: 55% to less than 60%, 60–65%: 60% to less than 65%, 65–70%: 65% to less than 70%, 70–75%: 70% to less than 75%, and ≥75%: 75% or more.<sup>1</sup> For energy by ANCOVA with sex and age as covariates. For the rest of nutrients by ANCOVA with total energy intake in addition to sex and age.<sup>2</sup> Post-hoc test: Holm–Bonferroni, a > b > c > d > e > f > g > h.

**Table S2.** The food group intake of Korean adults according to the level of energy intake from carbohydrate.

|                        | <45%<br>(n=527)        | 45–50%<br>(n=459)      | 50–55%<br>(n=740)      | 55–60%<br>(n=1037)    | 60–65%<br>(n=1342)     | 65–70%<br>(n=1281)    | 70–75%<br>(n=1116)    | ≥75%<br>(n=1064)       | <i>p</i> <sup>1</sup> |
|------------------------|------------------------|------------------------|------------------------|-----------------------|------------------------|-----------------------|-----------------------|------------------------|-----------------------|
|                        | Mean ± SE              |                        |                        |                       |                        |                       |                       |                        |                       |
| Grains                 | 205 ± 6 <sup>h2</sup>  | 275 ± 9 <sup>g</sup>   | 301 ± 7 <sup>f</sup>   | 329 ± 6 <sup>e</sup>  | 325 ± 4 <sup>d</sup>   | 348 ± 5 <sup>c</sup>  | 361 ± 7 <sup>b</sup>  | 372 ± 8 <sup>a</sup>   | <0.001                |
| Meat·fish·eggs·legumes | 511 ± 13 <sup>a</sup>  | 422 ± 15 <sup>b</sup>  | 377 ± 10 <sup>c</sup>  | 325 ± 7 <sup>d</sup>  | 290 ± 6 <sup>e</sup>   | 265 ± 7 <sup>f</sup>  | 217 ± 7 <sup>g</sup>  | 151 ± 6 <sup>h</sup>   | <0.001                |
| Vegetables             | 321 ± 10 <sup>c</sup>  | 337 ± 14 <sup>ab</sup> | 344 ± 10 <sup>ab</sup> | 335 ± 9 <sup>ab</sup> | 329 ± 6 <sup>b</sup>   | 364 ± 8 <sup>a</sup>  | 354 ± 8 <sup>ab</sup> | 345 ± 10 <sup>ab</sup> | <0.001                |
| Fruits                 | 101 ± 8 <sup>g</sup>   | 109 ± 9 <sup>fg</sup>  | 129 ± 8 <sup>ef</sup>  | 161 ± 9 <sup>de</sup> | 172 ± 8 <sup>cd</sup>  | 191 ± 9 <sup>bc</sup> | 207 ± 10 <sup>b</sup> | 295 ± 13 <sup>a</sup>  | <0.001                |
| Dairy products         | 90 ± 9 <sup>bcde</sup> | 114 ± 9 <sup>abc</sup> | 102 ± 6 <sup>bcd</sup> | 111 ± 6 <sup>ab</sup> | 104 ± 5 <sup>abc</sup> | 83 ± 4 <sup>cd</sup>  | 66 ± 4 <sup>d</sup>   | 43 ± 3 <sup>e</sup>    | <0.001                |

Note: The data were analyzed using the complex sample module. <45%: less than 45%, 45–50%: 45% to less than 50%, 50–55%: 50% to less than 55%, 55–60%: 55% to less than 60%, 60–65%: 60% to less than 65%, 65–70%: 65% to less than 70%, 70–75%: 70% to less than 75%, and ≥75%: 75% or more.<sup>1</sup> By ANCOVA with sex, age and the total energy intake as covariates. <sup>2</sup> Post-hoc test: Holm–Bonferroni, a > b > c > d > e > f > g > h.

**Table S3.** The biochemical indices of Korean adults according to the level of energy intake from carbohydrate.

|                                 | <45%<br>(n=527)       | 45–50%<br>(n=459)      | 50–55%<br>(n=740)       | 55–60%<br>(n=1037)     | 60–65%<br>(n=1342)     | 65–70%<br>(n=1281)     | 70–75%<br>(n=1116)     | ≥75%<br>(n=1064)      | p <sup>1</sup> |
|---------------------------------|-----------------------|------------------------|-------------------------|------------------------|------------------------|------------------------|------------------------|-----------------------|----------------|
|                                 | Mean ± SE             |                        |                         |                        |                        |                        |                        |                       |                |
| Systolic blood pressure (mmHg)  | 114.3±0.6             | 114.4±0.7              | 113.9±0.4               | 113.7±0.5              | 115.1±0.4              | 116.0±0.4              | 116.6±0.5              | 117.8±0.6             | 0.454          |
| Diastolic blood pressure (mmHg) | 76.3±0.5              | 76.4±0.5               | 76.2±0.4                | 76.0±0.3               | 76.3±0.3               | 76.8±0.3               | 77.2±0.3               | 76.4±0.3              | 0.094          |
| BMI (kg/m <sup>2</sup> )        | 24.3±0.1              | 23.7±0.2               | 23.9±0.1                | 23.8±0.1               | 23.7±0.1               | 23.9±0.1               | 23.7±0.1               | 23.9±0.1              | 0.166          |
| Waist circumference (cm)        | 82.2±0.5              | 81.2±0.5               | 81.7±0.4                | 81.4±0.3               | 81.1±0.3               | 81.9±0.3               | 81.2±0.3               | 81.9±0.4              | 0.273          |
| Triglyceride (mg/100mL)         | 139±7                 | 141±8                  | 137±6                   | 136±4                  | 135±3                  | 145±4                  | 135±4                  | 143±3                 | 0.897          |
| Total cholesterol (mg/100mL)    | 191±1 <sup>a2</sup>   | 193±1 <sup>a</sup>     | 191±1 <sup>ab</sup>     | 194±1 <sup>a</sup>     | 194±1 <sup>a</sup>     | 196±1 <sup>a</sup>     | 194±1 <sup>ab</sup>    | 193±1 <sup>b</sup>    | 0.005          |
| HDL-cholesterol (mg/100mL)      | 53.0±0.5 <sup>a</sup> | 52.9±0.6 <sup>ab</sup> | 52.0±0.5 <sup>abc</sup> | 52.2±0.4 <sup>ab</sup> | 52.4±0.4 <sup>ab</sup> | 51.1±0.3 <sup>bc</sup> | 51.3±0.4 <sup>bc</sup> | 50.3±0.4 <sup>c</sup> | <0.001         |
| LDL-cholesterol (mg/100mL)      | 117±4                 | 121±4                  | 119±3                   | 115±2                  | 123±2                  | 120±2                  | 122±3                  | 115±2                 | 0.403          |
| Fasting glucose (mg/100mL)      | 95.5±0.9              | 96.4±0.8               | 95.8±0.6                | 96.2±0.6               | 98.8±0.8               | 98.0±0.6               | 98.1±0.6               | 102.6±1.0             | 0.222          |

Note: The data was analyzed using the complex sample module. <45%: less than 45%, 45–50%: 45% to less than 50%, 50–55%: 50% to less than 55%, 55–60%: 55% to less than 60%, 60–65%: 60% to less than 65%, 65–70%: 65% to less than 70%, 70–75%: 70% to less than 75%, and ≥75%: 75% or more.<sup>1</sup>

By ANCOVA with sex and age as covariates. <sup>2</sup> Post-hoc test: Holm–Bonferroni, a> b > c.
